# Supplementary figures and images for: Broad-Based Influenza-Specific CD8+ T Cell Response without the Typical Immunodominance Hierarchy and Its Potential Implication
Source: MDPI journal article supplement (doi:10.3390/v13061080), 2021-06-05

Figure S1.

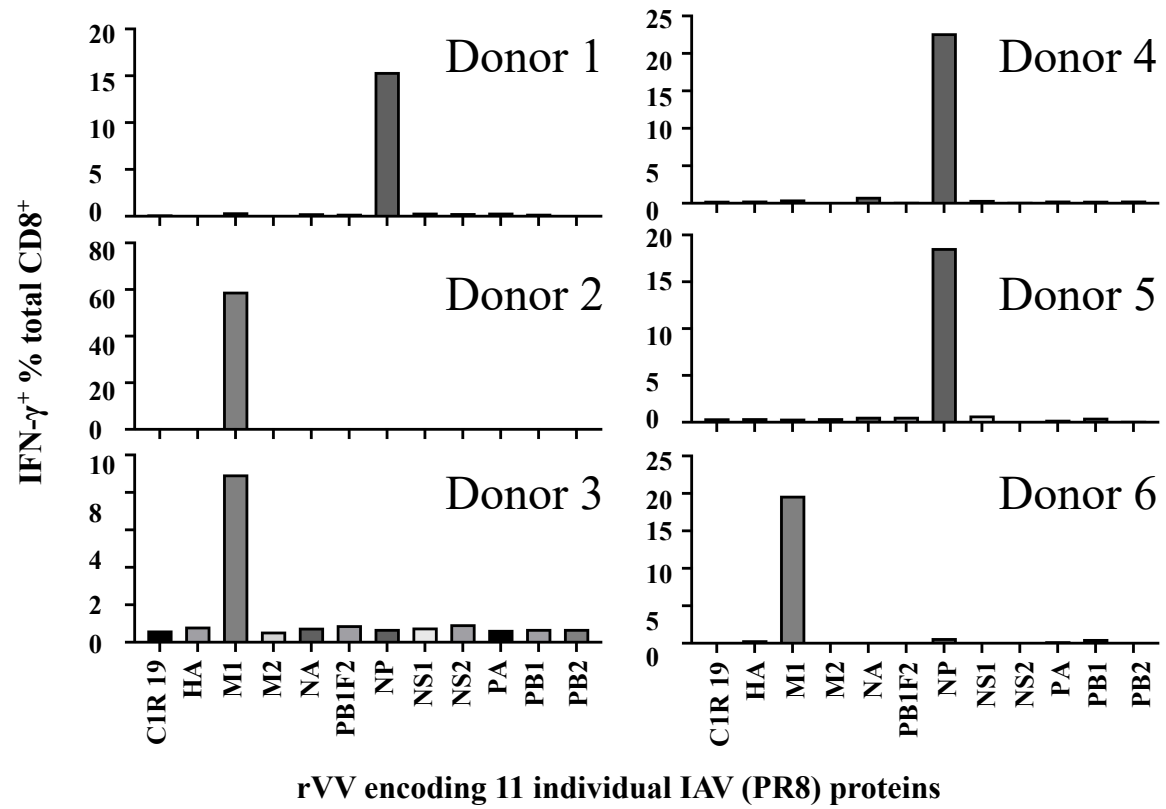

Figure S2.

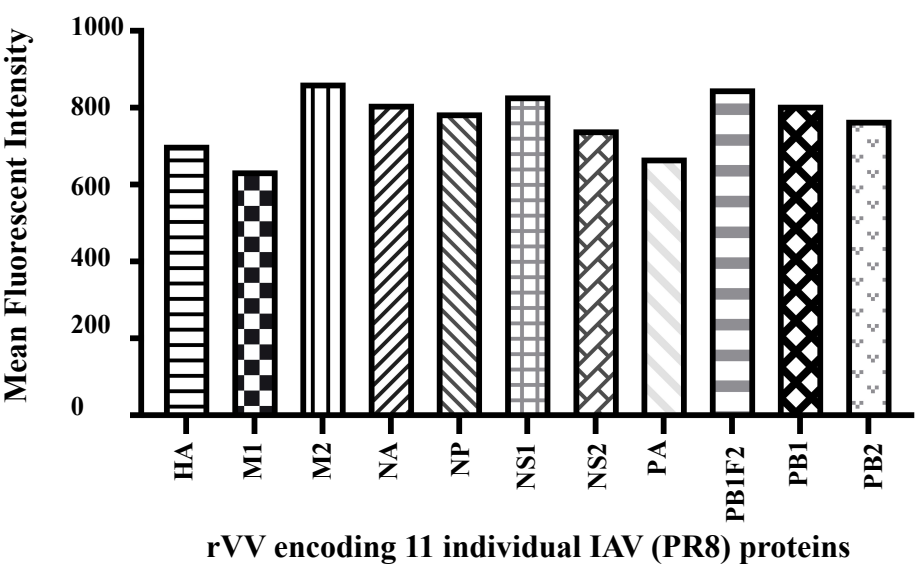

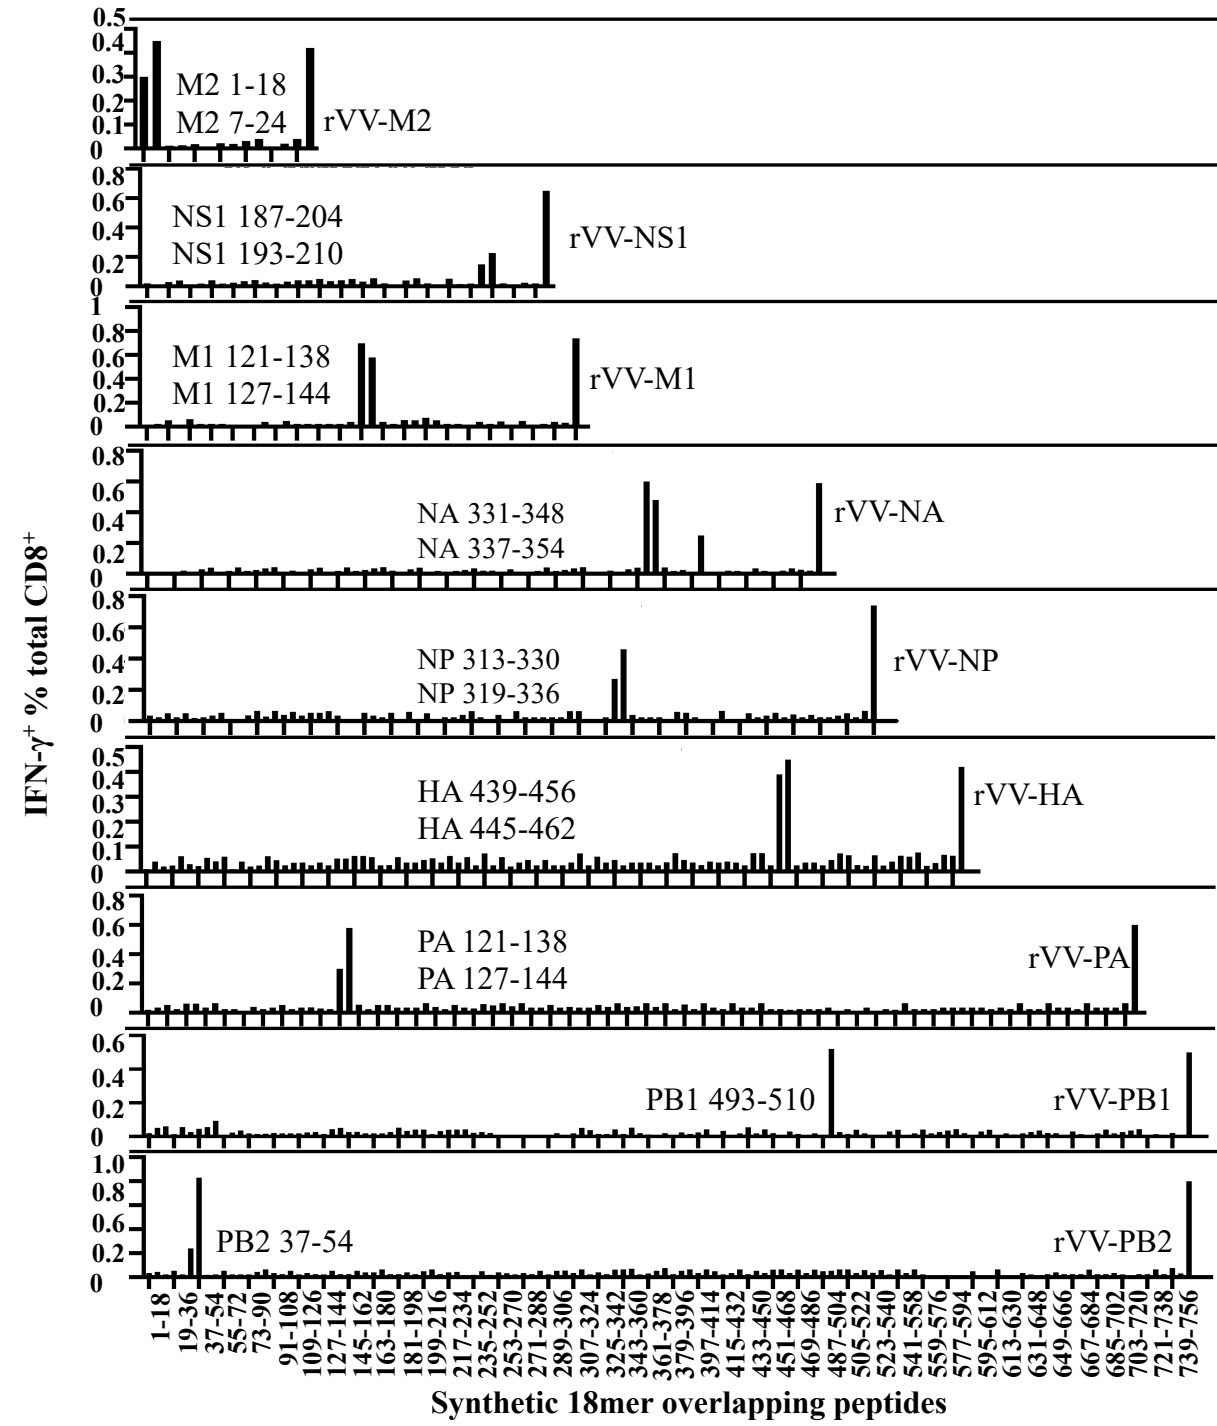

Figure S3.

Figure S4.

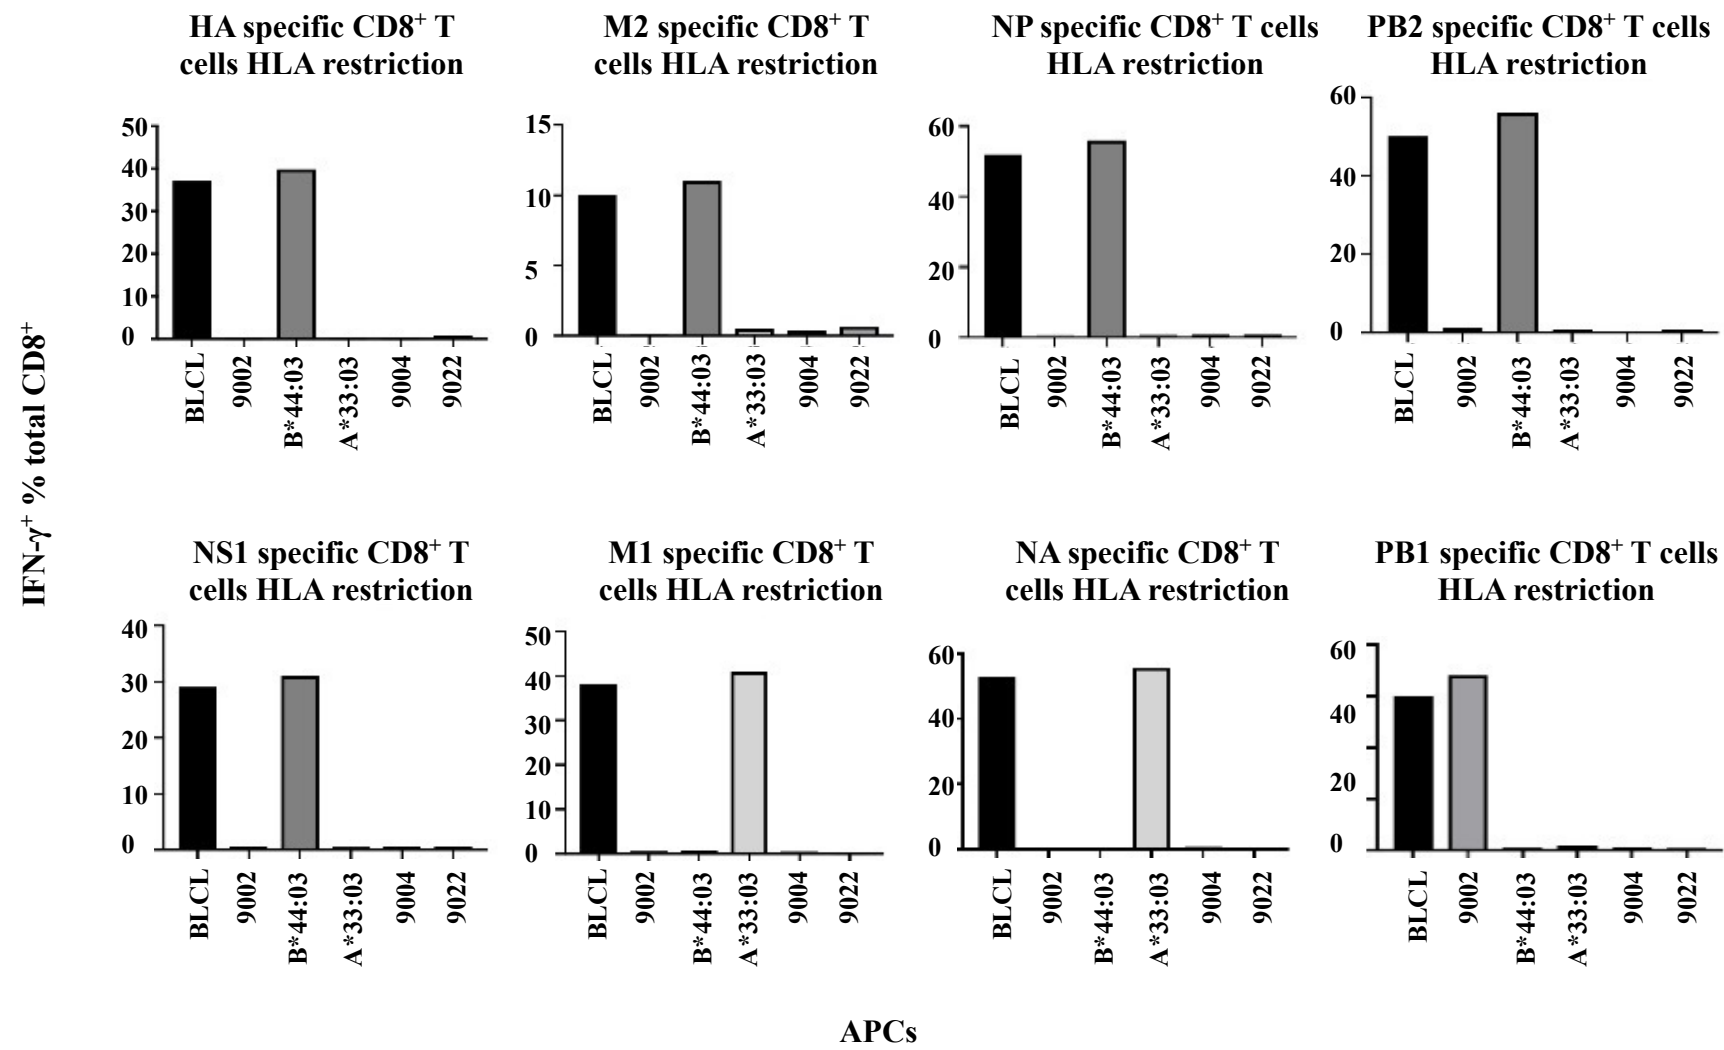

Supplement: s1 [file s1]
